# Supplementary material for: Nacre-inspired layered composite gels with broad tunable mechanical strength and structural color for stress visualization
Source: Royal Society of Chemistry journal article supplement (doi:10.1039/d3nr01362f), 2023-01-01
Supplement: d3nr01362f1.pdf [file d3nr01362f1.pdf]

**Electronic Supplementary Information**

**Nacre-inspired layered composite gels with broad tunable  
mechanical strength and structural color for stress visualization**

Yunpeng Wang, Xinyu Kan, Yaru Liu, Jie Ju\*, Xi Yao\*

Key Laboratory for Special Functional Materials of Ministry of Education, School of  
Materials and Engineering, Henan University, Kaifeng 475000, China.

E-mail: yaoxi@henu.edu.cn; jujie@henu.edu.cn

**Tab. S1** Specific component of solution A containing polymeric monomers

| DAAM (g) | AAM (g) | MBAA (mg) | 1173 ( $\mu\text{L}$ ) | H <sub>2</sub> O (mL) |
|----------|---------|-----------|------------------------|-----------------------|
| 2        | 1       | 2         | 10                     | 5                     |
| 2        | 1       | 4         | 10                     | 5                     |
| 2        | 1       | 8         | 10                     | 5                     |
| 2        | 1       | 16        | 10                     | 5                     |
| 2        | 1       | 32        | 10                     | 5                     |
| 2        | 1       | 64        | 10                     | 5                     |

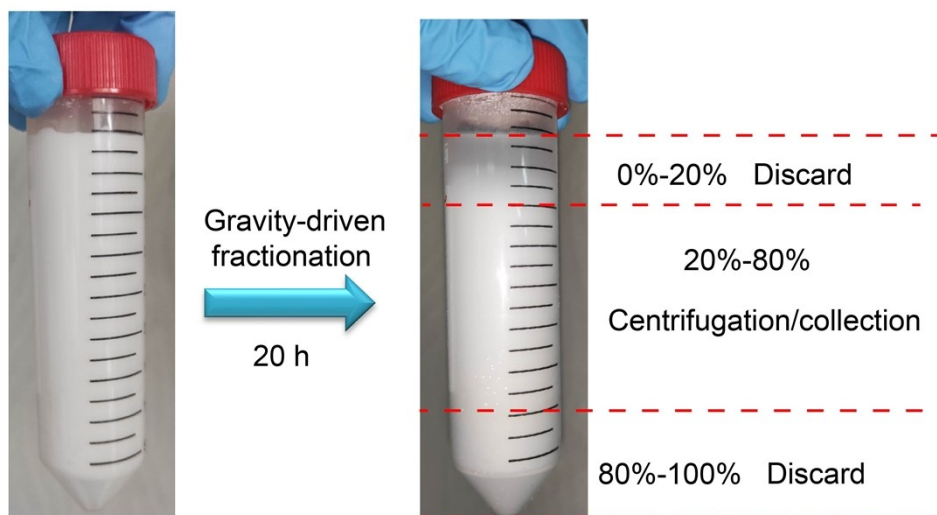

**Fig. S1** Digital images of  $\alpha$ -ZrP suspension under gravity.

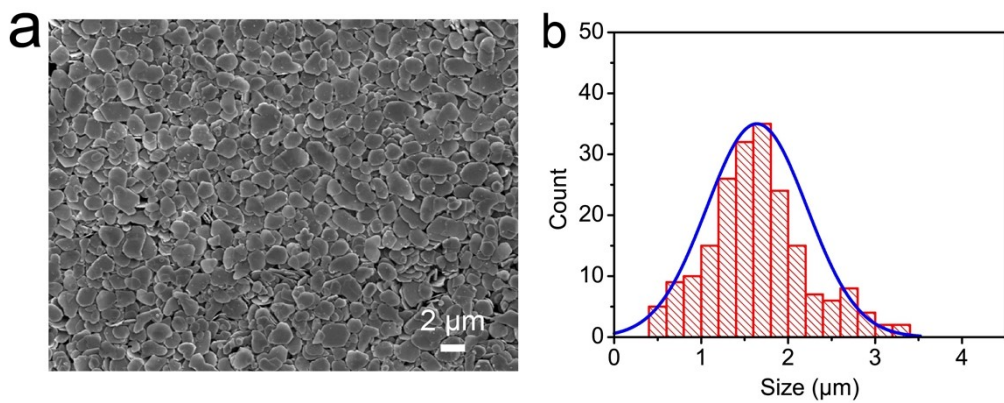

**Fig. S2** (a) SEM image and (b) lateral size distribution of the original  $\alpha$ -ZrP nanoplates.

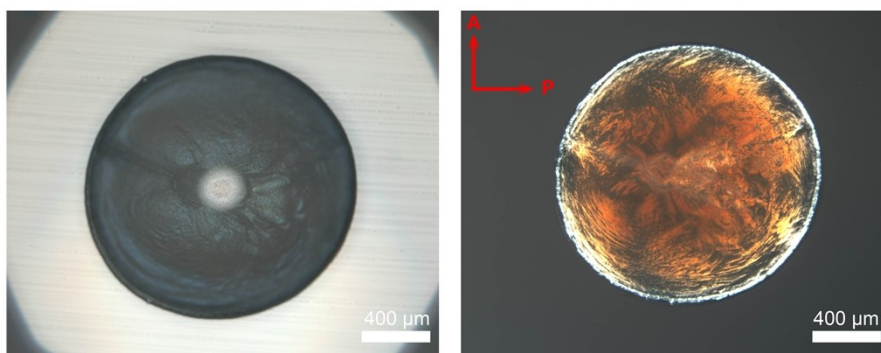

**Fig.S3** Polarizing light microscopic images of photonic LC suspensions. Image “a” was taken under parallel polarizers and “b” was taken under crossed polarizers.

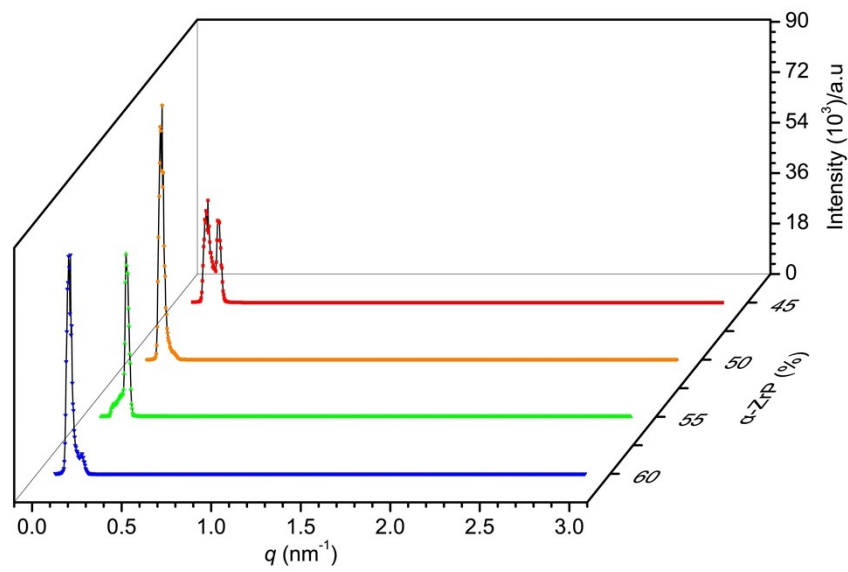

**Fig.S4** SAXS profiles of the  $\alpha$ -ZrP suspensions.

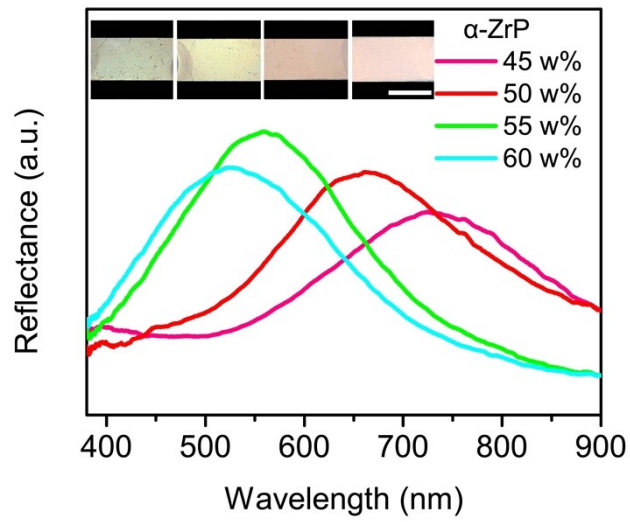

**Fig.S5** Reflection spectra of composite hydrogels prepared based on different mass fractions of  $\alpha$ -ZrP suspensions, the insets are the corresponding structural color, scale bar is 1cm.

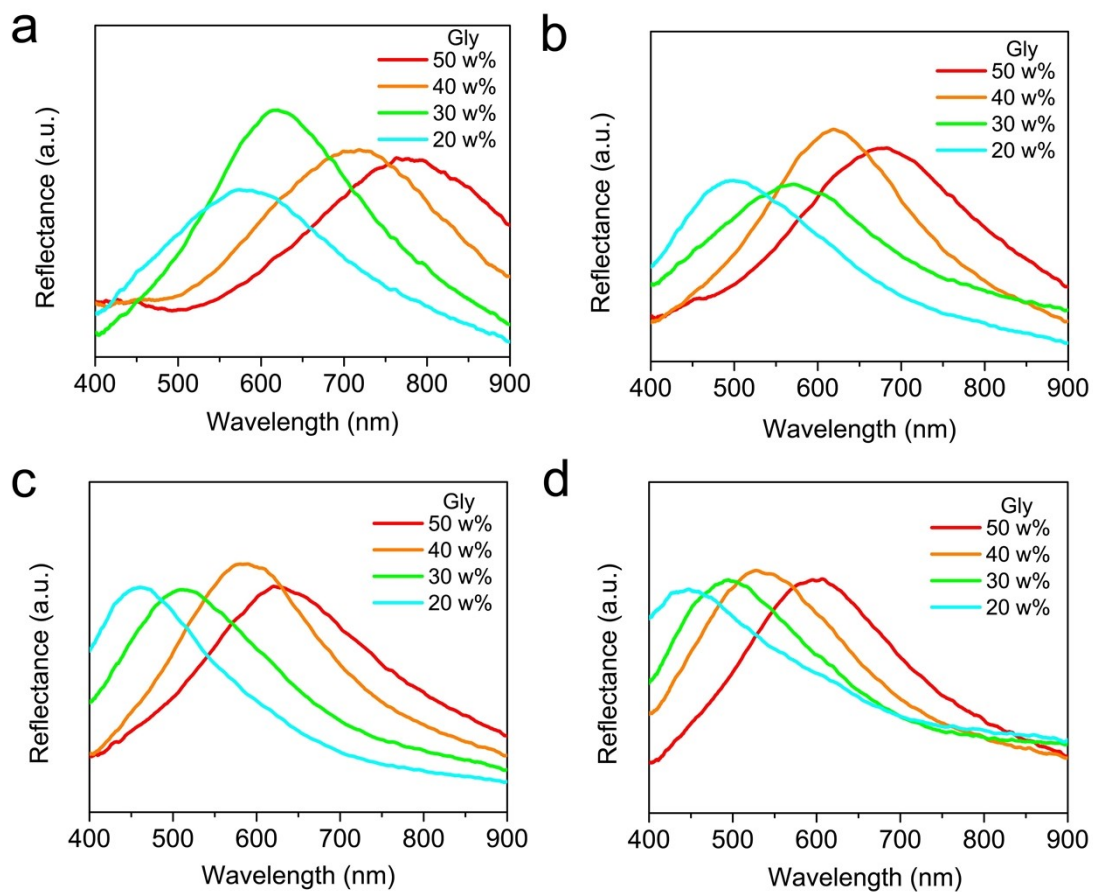

**Fig.S6** Reflection spectra of composite gels after solvent replacement and heating treatment, prepared by (a) 45 w%, (b) 50 w%, (c) 55 w%, and (d) 60 w%  $\alpha$ -ZrP suspensions.



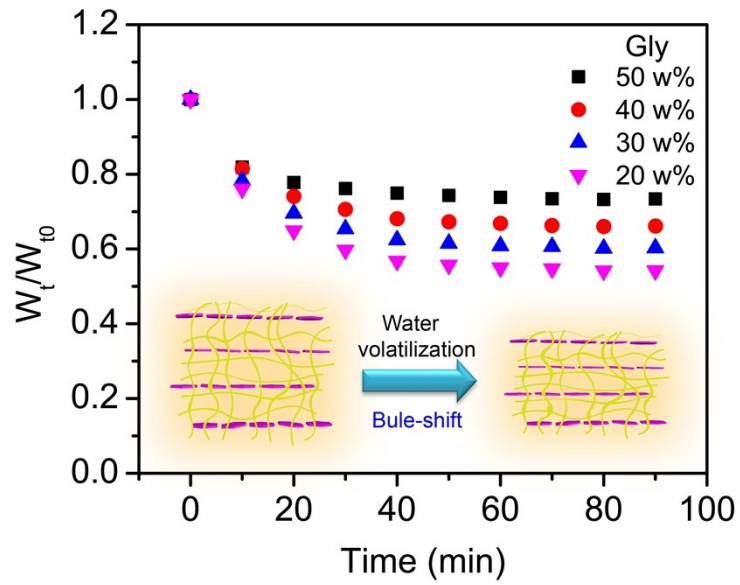

**Fig. S7** Weight changes of composite gels during heating treatment.  $W_0$  refers to quality of the swelling organohydrogels after just solvent replacement.

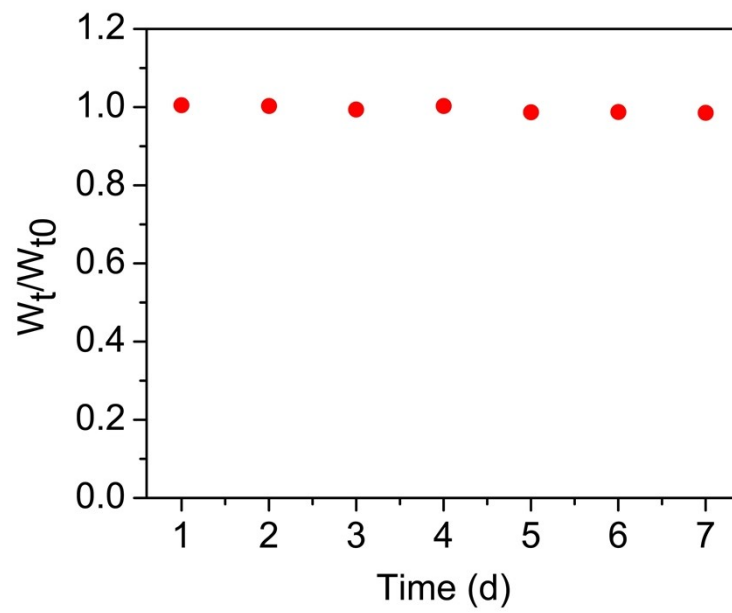

**Fig. S8** Weight change of the composite gels with time at 35% RH.

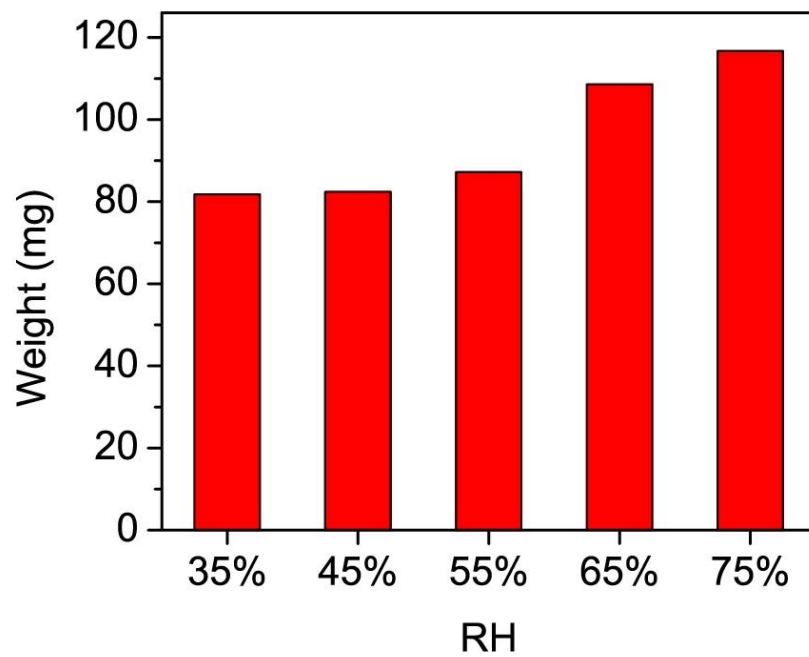

**Fig. S9** Weight of a composite gel sample at different RH.

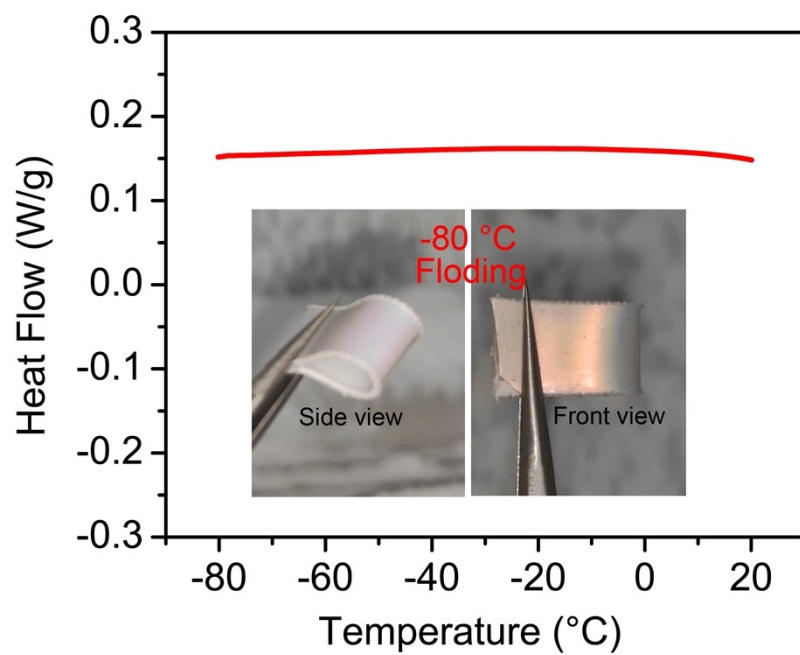

**Fig. S10** DSC spectra of composite gels. Insets are photographs of the sample being bent after being placed at -80°C for 48h. Front view shows structural color still exists.

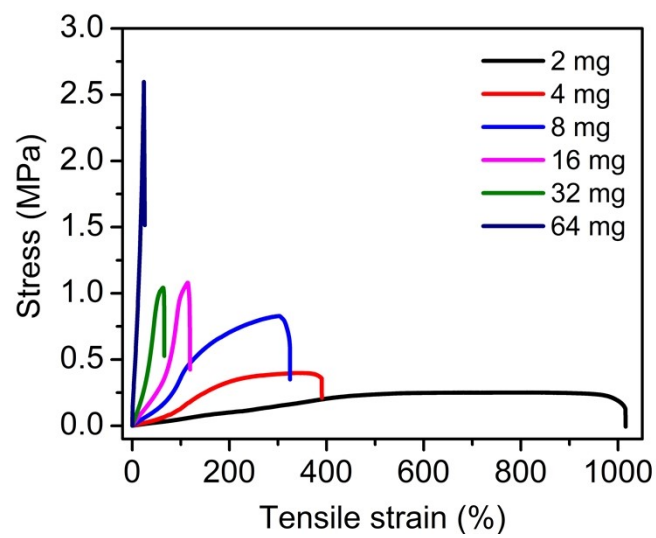

**Fig. S11** Tensile stress-strain curves of composite gels prepared with different crosslinker contents.

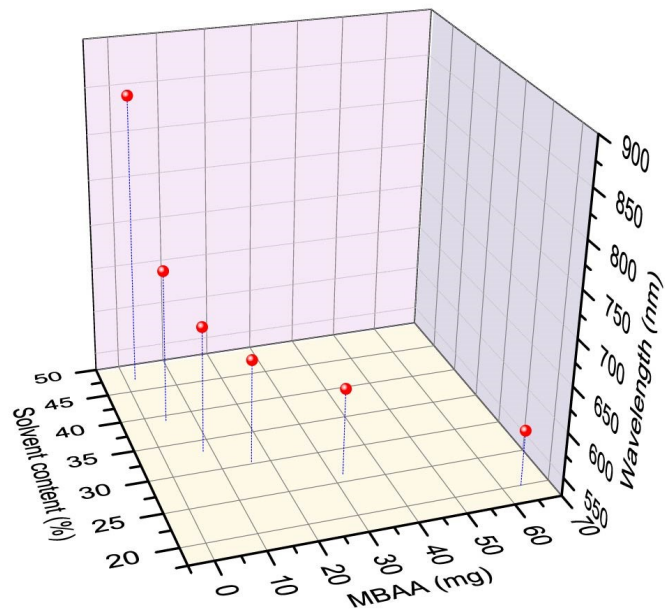

**Fig. S12** Solvent content and reflection wavelength of composite gels prepared with different crosslinker contents.

**Tab. S2** Specific component of solution A containing AAM:DAAM monomer ratio

| AAM (g) | DAAM (g) | MBAA (mg) | 1173 ( $\mu\text{L}$ ) | H <sub>2</sub> O (mL) |
|---------|----------|-----------|------------------------|-----------------------|
| 2.25    | 0.75     | 64        | 10                     | 5                     |
| 2       | 1        | 64        | 10                     | 5                     |
| 1.5     | 1.5      | 64        | 10                     | 5                     |
| 1       | 2        | 64        | 10                     | 5                     |
| 0.75    | 2.25     | 64        | 10                     | 5                     |

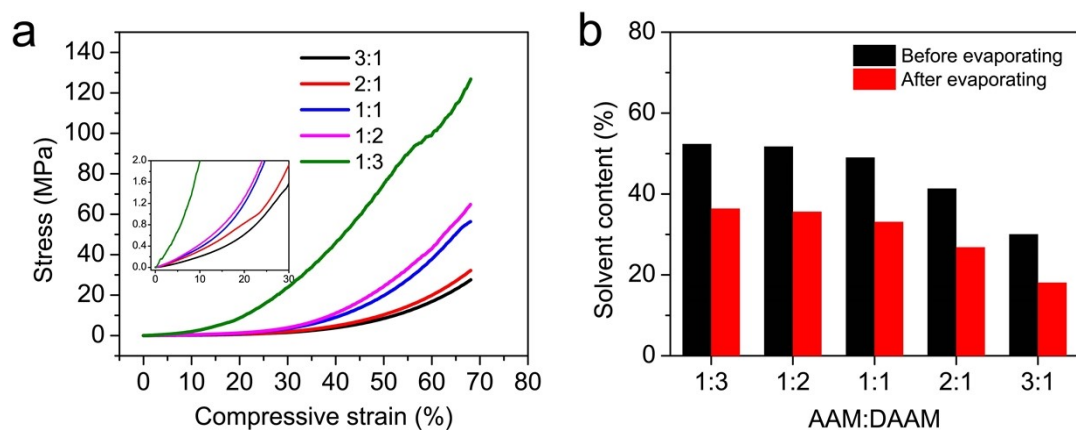

**Fig. S13** (a) Tensile stress-strain curves of composite gels prepared with different AAM:DAAM monomer ratio in Tab. S2. (b) Solvent content of corresponding samples before and after heating treatment. In the process of solvent replacement, the solvent content of the swelling composite organohydrogels decreased due to the increase of the hydrophobic polymer fragments (PDAAM). Therefore, the solvent content of the final composite gels after heating treatment also decreased.



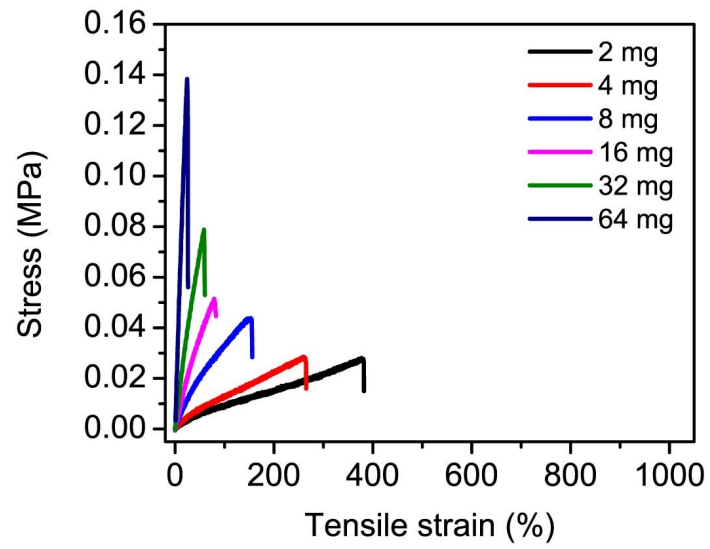

**Fig. S14** Tensile stress-strain curves of pure PDAAM-*co*-PAAM gels matrix prepared with different crosslinker contents.

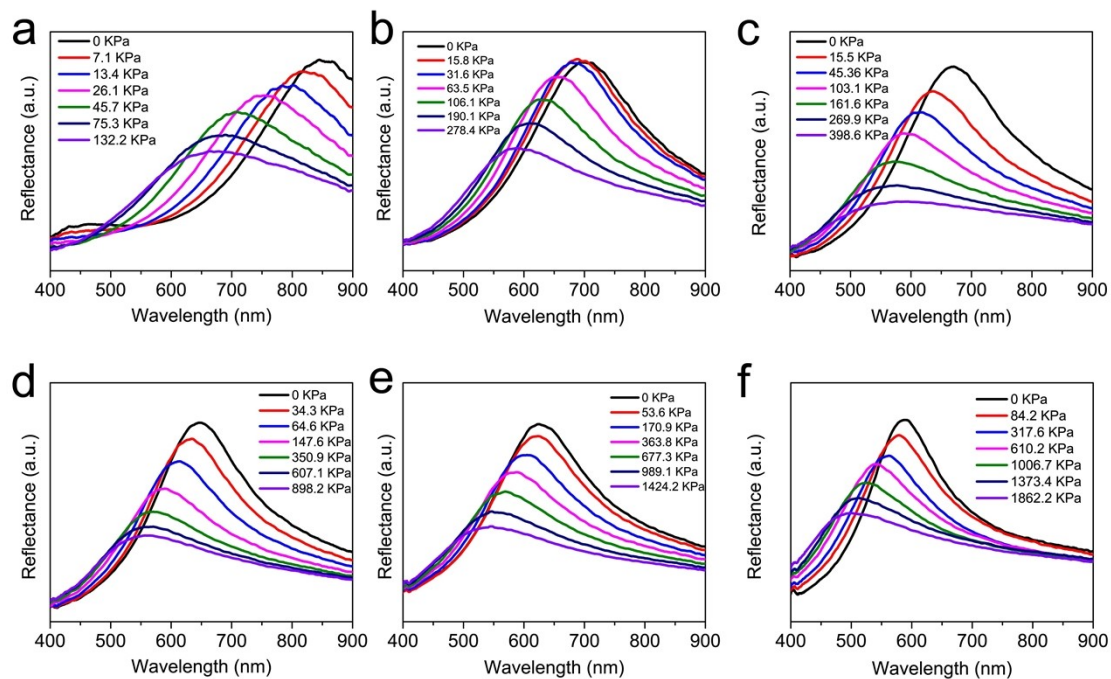

**Fig. S15** Reflection spectra evolution of composite gels with different crosslinker contents under different compression stress. The samples are prepared via adjusting the content of crosslinker MBAA in Solution A: (a) 2 mg (b) 4 mg (c) 8 mg (d) 16 mg (e) 32 mg (f) 24 mg.

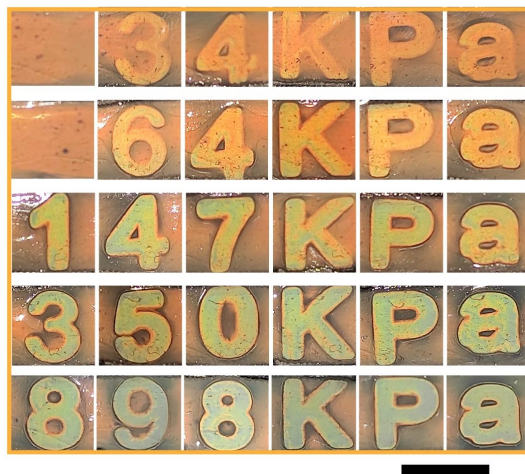

**Fig. S16** Digital images showing applied compressive stresses and structural color changes, scale bar is 1 cm. The sample was prepared using 16 mg crosslinker in solution A.
